# Supplementary material
Source: publisher site journal article supplement (https://www.dovepress.com/article/307676)
Supplement: Supplementary file 1 [file get_supplementary_file.php]

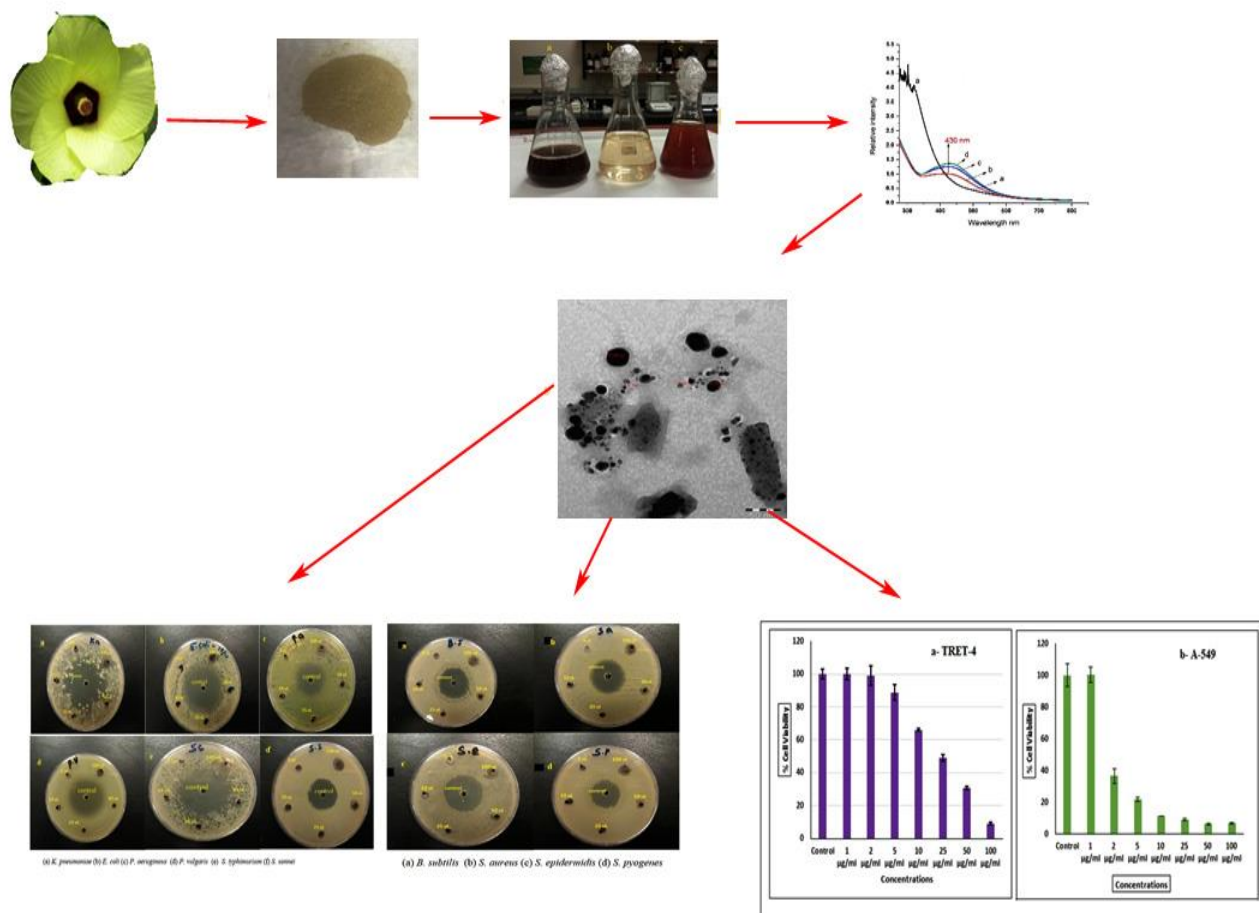

Supplementary Figure 1

## Figure Caption

The process for preparation of plant extract, synthesis of silver nanoparticles, characterizations and their biological effects.
